# Supplementary material for: Eu(CO3)33? and the limiting carbonate complexes of other M3+ f-elements in aqueous solutions: a solubility and TRLFS study
Source: Royal Society of Chemistry journal article supplement (doi:10.1039/b413002b), 2005-01-01

Supplementary materials

**Table S1** Solubility data and calculations for dissolution experiments of  $\text{NaEu}(\text{CO}_3)_2 \cdot x\text{H}_2\text{O}(\text{s})$  in  $\text{Na}_2\text{CO}_3$ - $\text{NaClO}_4$  solutions.

| t               | $[\text{Na}_2\text{CO}_3]^a$ | $[\text{NaClO}_4]^a$ | p                   | $I_m$                 | pH <sup>b</sup> | $-\log[\text{H}^+]^c$ | $\log[\text{CO}_3^{2-}]^d$ | $\log[\text{Eu}]$  |
|-----------------|------------------------------|----------------------|---------------------|-----------------------|-----------------|-----------------------|----------------------------|--------------------|
| /weeks          | /mol l <sup>-1</sup>         | /mol l <sup>-1</sup> | /l kg <sup>-1</sup> | /mol kg <sup>-1</sup> |                 |                       |                            |                    |
| 10              | 2.00                         | 0.00                 | 1.2039              | 7.22                  | 12.23           | 11.50                 | 0.30                       | -4.18 <sup>e</sup> |
| 14 <sup>f</sup> | 1.00                         | 0.00                 | 1.0554              | 3.17                  | 11.73           | 11.51                 | 0.00                       | -4.50 <sup>e</sup> |
| 10              | 1.00                         | 1.00                 | 1.1670              | 4.67                  | 11.88           | 11.34                 | 0.00                       | -4.71              |
| 10              | 0.30                         | 2.40                 | 1.1752              | 3.88                  | 11.58           | 11.03                 | -0.53                      | -5.45              |
| 10              | 0.10                         | 2.80 <sup>g</sup>    | 1.0687              | 3.31                  | 11.24           | 10.37                 | -1.03                      | -5.84              |
| 10              | 0.03                         | 2.94                 | 1.1692              | 3.54                  | 11.05           | 10.50                 | -1.55                      | -6.05              |
| 10              | 0.01                         | 2.98                 | 1.1686              | 3.52                  | 10.81           | 10.27                 | -2.05                      | -6.75 <sup>e</sup> |
| 10              | 0.30                         | 0.40                 | 1.0437              | 1.36                  | 11.40           | 11.12                 | -0.53                      | -4.96              |
| 10              | 0.10                         | 0.80                 | 1.0508              | 1.16                  | 11.17           | 10.81                 | -1.02                      | -5.28              |
| 10              | 0.01                         | 0.98                 | 1.0508              | 1.06                  | 10.67           | 10.35                 | -2.04                      | -6.94              |
| 10              | 0.30                         | 0.00                 | 1.0082              | 0.91                  | 11.39           | 11.25                 | -0.53                      | -4.51              |
| 10              | 0.03                         | 0.00                 | 1.0025              | 0.09                  | 11.10           | 10.62                 | -1.57                      | -5.91              |
| 16              | 2.00                         | 0.00                 | 1.2039              | 7.22                  | 12.23           | 11.44                 | 0.30                       | -4.19              |
| 20 <sup>f</sup> | 1.00                         | 0.00                 | 1.0554              | 3.17                  | 11.73           | 11.46                 | 0.00                       | -4.55 <sup>e</sup> |
| 16              | 1.00                         | 1.00                 | 1.1670              | 4.67                  | 11.88           | 11.27                 | -0.01                      | -4.74              |
| 16              | 0.30                         | 2.40                 | 1.1752              | 3.88                  | 11.58           | 10.95                 | -0.53                      | -5.49              |
| 16              | 0.10                         | 2.80 <sup>g</sup>    | 1.0687              | 3.31                  | 11.24           | 10.33                 | -1.04                      | -5.89              |
| 16              | 0.03                         | 2.94                 | 1.1692              | 3.54                  | 11.05           | 10.28                 | -1.57                      | -6.10              |
| 16              | 0.01                         | 2.98                 | 1.1686              | 3.52                  | 10.81           | 10.08                 | -2.07                      | -6.63              |
| 16              | 0.30                         | 0.40                 | 1.0437              | 1.36                  | 11.40           | 11.06                 | -0.53                      | -5.10              |
| 16              | 0.10                         | 0.80                 | 1.0508              | 1.16                  | 11.17           | 10.75                 | -1.02                      | -5.35              |
| 16              | 0.01                         | 0.98                 | 1.0508              | 1.06                  | 10.67           | 10.29                 | -2.05                      | -6.67              |
| 16              | 0.30                         | 0.00                 | 1.0082              | 0.91                  | 11.39           | 11.20                 | -0.53                      | -4.60              |
| 16              | 0.03                         | 0.00                 | 1.0025              | 0.09                  | 11.10           | 10.70                 | -1.56                      | -5.92 <sup>e</sup> |

<sup>a</sup> Initial concentration.

<sup>b</sup> Calculated pH :  $\text{pH} = 0.5 (pK_w + \log K_1 + \log[\text{CO}_3^{2-}])$ , where  $K_w$  is the ionic product of water ( $pK_w^\circ = 14.00$ ,  $\Delta z^2 = 2$ ,  $\varepsilon_{\text{H}^+\text{ClO}_4^-} = 0.14 \text{ kg mol}^{-1}$ ;  $\varepsilon_{\text{Na}^+\text{OH}^-} = 0.04 \text{ kg mol}^{-1}$ ,  $\phi_{\text{NaClO}_4} = -0.015_3$ ) and  $K_1$  the equilibrium constant for  $\text{CO}_3^{2-} + \text{H}^+ \rightleftharpoons \text{HCO}_3^-$  ( $pK_w^\circ = -10.329$ ,  $\Delta z^2 = -4$ ,  $\varepsilon_{\text{Na}^+\text{HCO}_3^-} = -0.03 \text{ kg mol}^{-1}$ ,  $\varepsilon_{\text{H}^+\text{ClO}_4^-} = 0.14 \text{ kg mol}^{-1}$ ,  $\varepsilon_{\text{Na}^+\text{CO}_3^{2-}} = -0.08 \text{ kg mol}^{-1}$ ).<sup>4</sup>

<sup>c</sup> Errors in the response of the electrodes may occur for values higher than about 11 due to alkaline effect.

<sup>d</sup>  $[\text{CO}_3^{2-}] = ([\text{Na}^+] + [\text{H}^+] - K_w / [\text{H}^+]) / (2 + K_1 [\text{H}^+])$  ( $K_w$  and  $K_1$  are defined in footnote <sup>b</sup>).

<sup>e</sup> The nature of the solid,  $\text{NaEu}(\text{CO}_3)_2 \cdot x\text{H}_2\text{O}(\text{s})$ , was confirmed by XRD analysis.

<sup>f</sup> Initial solution in which  $\text{NaEu}(\text{CO}_3)_2 \cdot x\text{H}_2\text{O}(\text{s})$  precipitated.

<sup>g</sup>  $\text{ClO}_4^-$  was replaced by  $\text{Cl}^-$ .

**Table S2** Bragg reflections of non-altered and altered  $\text{NaEu}(\text{CO}_3)_2 \cdot x\text{H}_2\text{O}(\text{s})$ , in comparison with literature data.

| $\text{NaEu}(\text{CO}_3)_2 \cdot x\text{H}_2\text{O}$ |               | Altered $\text{NaEu}(\text{CO}_3)_2 \cdot x\text{H}_2\text{O}$ |               | $\text{NaEu}(\text{CO}_3)_2 \cdot 5\text{H}_2\text{O}^{21}$ |               | $\text{NaEu}(\text{CO}_3)_2 \cdot 6\text{H}_2\text{O}^{22}$ |
|--------------------------------------------------------|---------------|----------------------------------------------------------------|---------------|-------------------------------------------------------------|---------------|-------------------------------------------------------------|
| d /Å                                                   | Rel. int. (%) | d /Å                                                           | Rel. int. (%) | d /Å                                                        | Rel. int. (%) | d /Å                                                        |
| 12.72                                                  | 100           | 12.89                                                          | 100           | 13.01                                                       | 60            | 12.0752                                                     |
|                                                        |               | 9.82                                                           | 80            |                                                             |               |                                                             |
| 6.43                                                   | 30            | 6.48                                                           | 30            | 6.49                                                        | 30            | 6.265                                                       |
|                                                        |               | 5.68                                                           | 30            |                                                             |               |                                                             |
|                                                        |               | 5.11                                                           | 60            |                                                             |               |                                                             |
|                                                        |               | 4.92                                                           | 10            |                                                             |               |                                                             |
| 4.55                                                   | 20            | 4.57                                                           | 10            | 4.57                                                        | 100           |                                                             |
|                                                        |               | 4.49                                                           | <10           |                                                             |               |                                                             |
| 4.31                                                   | 40            | 4.32                                                           | 20            | 4.31                                                        | 70            | 4.221                                                       |
|                                                        |               | 3.80                                                           | 40            |                                                             |               |                                                             |
|                                                        |               | 3.72                                                           | 10            |                                                             |               |                                                             |
| 3.29                                                   | <10           | 3.28                                                           | 50            | 3.3                                                         | 60            | 3.2466                                                      |
|                                                        |               |                                                                |               | 3.21                                                        | 60            |                                                             |
| 3.20                                                   | <10           |                                                                |               | 3.19                                                        | 50            |                                                             |
| 3.16                                                   | <10           | 3.16                                                           | 40            | 3.16                                                        | 40            |                                                             |
| 3.07                                                   | 10            | 3.07                                                           | <10           | 3.07                                                        | 80            |                                                             |
|                                                        |               | 2.99                                                           | <10           | 3.01                                                        | 10            |                                                             |
|                                                        |               |                                                                |               | 2.95                                                        | 20            |                                                             |
| 2.91                                                   | <10           | 2.92                                                           | <10           | 2.92                                                        | 20            |                                                             |
| 2.84                                                   | <10           | 2.86                                                           | <10           | 2.86                                                        | 30            |                                                             |
|                                                        |               | 2.73                                                           | 40            |                                                             |               |                                                             |
| 2.63                                                   | <10           | 2.65                                                           | 30            |                                                             |               |                                                             |
| 2.59                                                   | 10            | 2.60                                                           | <10           |                                                             |               |                                                             |
| 2.55                                                   | <10           | 2.57                                                           | 10            | 2.57                                                        | <10           | 2.5631                                                      |
|                                                        |               | 2.48                                                           | 60            |                                                             |               |                                                             |
|                                                        |               | 2.33                                                           | 20            |                                                             |               |                                                             |
|                                                        |               | 2.28                                                           | 10            | 2.28                                                        | <10           |                                                             |
| 2.26                                                   | <10           | 2.26                                                           | 10            | 2.25                                                        | 10            |                                                             |
| 2.16                                                   | <10           | 2.15                                                           | 10            | 2.16                                                        | 20            | 2.1371                                                      |
| 2.08                                                   | <10           | 2.11                                                           | 30            | 2.08                                                        | 30            |                                                             |
|                                                        |               | 2.08                                                           | <10           | 2.05                                                        | 30            |                                                             |
|                                                        |               | 2.06                                                           | 30            |                                                             |               |                                                             |
| 2.02                                                   | <10           | 2.03                                                           | <10           | 2.02                                                        | <10           |                                                             |
| 2.00                                                   | <10           |                                                                |               | 2.01                                                        | 10            |                                                             |

**Fig. S1** XRD powder patterns for the solubility-controlling phase,  $\text{NaEu}(\text{CO}_3)_2 \cdot x\text{H}_2\text{O}(\text{s})$ , analysed (a) immediately after filtration and (b) few days after, resulting in alteration of  $\text{NaEu}(\text{CO}_3)_2 \cdot x\text{H}_2\text{O}(\text{s})$  to  $\text{Eu}_2(\text{CO}_3)_3 \cdot y\text{H}_2\text{O}(\text{s})$  and  $\text{Na}_2\text{CO}_3(\text{s})$ . Only a few peaks (noted with \*) could be assigned to  $\text{Eu}_2(\text{CO}_3)_3 \cdot y\text{H}_2\text{O}(\text{s})$  from the comparison with oven dried  $\text{Eu}_2(\text{CO}_3)_3(\text{s})$  as reported in Appendix 5.3 of Ref. 37 (p.376). The others were consistent with the previous measurements although, as in Ref. 37, they could not be easily assigned.

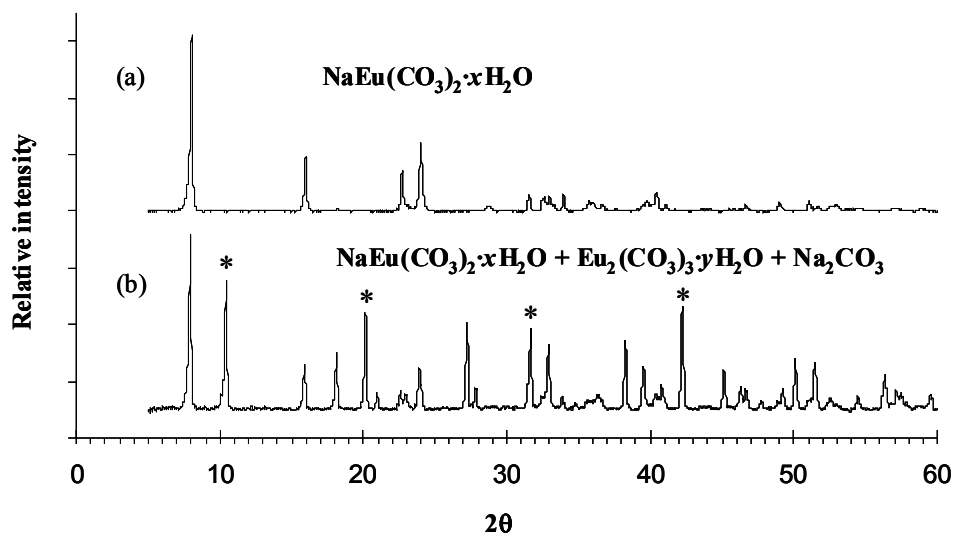

**Fig. S2** Infra-red spectrum of precipitated  $\text{NaEu}(\text{CO}_3)_2 \cdot x\text{H}_2\text{O}(\text{s})$ .

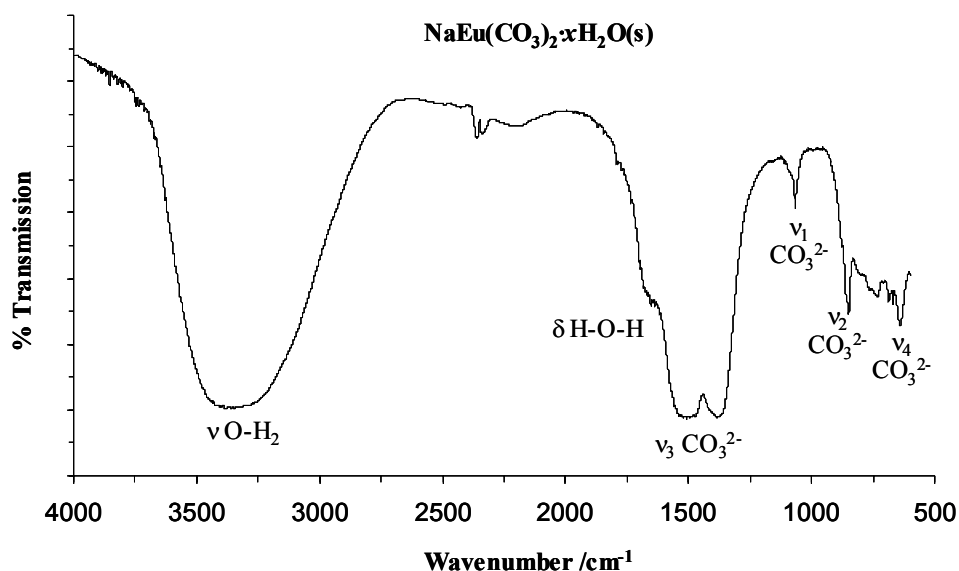

Supplement: b413002b.pdf [file b413002b.pdf]
